# Supplementary material for: Competing mechanisms for the reaction of dichloropropynylborane with 2-tert-butylbutadiene. Diels–Alder reaction versus alkynylboration
Source: Royal Society of Chemistry journal article supplement (doi:10.1039/c5ra12903f), 2015-01-01
Supplement: c5ra12903f1.pdf [file c5ra12903f1.pdf]

**Competing mechanisms for the reaction of dichloropropynylborane with 2-*tert*-butylbutadiene. Diels-Alder reaction *versus* Alkynylboration**

Margarita M. Vallejos,<sup>\*a</sup> and Silvina C. Pellegrinet<sup>\*b</sup>

Área de Química Orgánica, Departamento de Química, Facultad de Ciencias Exactas y Naturales y Agrimensura, Universidad Nacional del Nordeste, Avda. Libertad 5460, (3400) Corrientes, Argentina.

<sup>b</sup>Instituto de Química Rosario (CONICET), Facultad de Ciencias Bioquímicas y Farmacéuticas, Universidad Nacional de Rosario, Suipacha 531, Rosario (2000), Argentina. E-mail: vallejos.marga@gmail.com, pellegrinet@iquir-conicet.gov.ar

**Supporting Information**

List of contents:

- MPWB1K/6-311++G(d,p) energies in DCM for reactants and products. Page S2.
- Topological analysis of charge density properties along the reaction paths. Pages S3-S10.
- Cartesian coordinates and absolute energies (in hartrees), including ZPE of all stationary points reported in the paper and values of imaginary frequencies of all transition structures. Pages S11-S16.
- References. Page S17.

**Table S1.** MPWB1K/6-311++G(d,p) absolute total energies ( $E$ , in a.u.) and free energies ( $G$ , in a.u.) and relative energies ( $\Delta E$ , in kcal mol<sup>-1</sup>) and free energies ( $\Delta G$ , in kcal mol<sup>-1</sup>) in DCM

| Species  | $E$          | $\Delta E^a$ | $G$          | $\Delta G^a$ |
|----------|--------------|--------------|--------------|--------------|
| <b>1</b> | -313.13095   |              | -312.96274   |              |
| <b>2</b> | -1061.52240  |              | -1061.50106  |              |
| <b>3</b> | -1374.741492 | -55.31       | -1374.520023 | -35.28       |
| <b>4</b> | -1374.741573 | -55.36       | -1374.520132 | -35.35       |
| <b>5</b> | -1374.682483 | -18.28       | -1374.467729 | -2.46        |
| <b>6</b> | -1374.678666 | -15.88       | -1374.466575 | -1.74        |

<sup>a</sup> Relative to **1 + 2**.

## Topological analysis of charge density properties along the reaction paths

The topological concepts of the quantum theory of atoms in molecules (QTAIM) are well documented in the standard literature<sup>1,2</sup> thus, we only give the theoretical information needed for the discussion of our results.

In accordance with the QTAIM theory, a bond between two atoms is characterized by a line of maximum electron density, the bond path, that connects the respective nuclei and intersects the zero-flux surface of the electron density gradient field ( $\nabla\rho_r$ ) at the bond critical point (bcp). Several topological properties evaluated at the bcp are used to characterize the nature of a bonding interaction (calculated properties at the bcp in  $\rho_r$  topology are labeled with the subscript “b”): (1) the charge density,  $\rho_b$ , as a measure of accumulation of electron charge between the bonded nuclei, which reflects the bond strength; (2) the Laplacian of electron charge density,  $\nabla^2\rho_b$ , gives information about the local charge concentration ( $\nabla^2\rho_b < 0$ ) or depletion ( $\nabla^2\rho_b > 0$ ); and (3) the ellipticity, defined as  $\varepsilon = (\lambda_1/\lambda_2) - 1$ , gives an idea about the charge distribution around the bond path and also is employed to determine the  $\pi$  character of a bond and its stability.<sup>3</sup>  $\rho_b$  and  $\nabla^2\rho_b$  are employed to analyze the covalent character of an interaction.<sup>4</sup> The delocalization index (*DI*) indicates the extent of exchange of electrons between two atomic basins, and it can be calculated between two atoms bonded by a bond path or without having a bond path.<sup>5</sup> Another critical points often found in a molecular system are ring critical point (rcp) and cage critical point (ccp).

In the QTAIM context, an atom in a molecule might be defined as a region of space bounded by one or more zero-flux surfaces. The atomic electron population  $N(\Omega)$  can be obtained by integrating the electron density over the atomic basin, which can be used to calculate the corresponding atomic net charge as  $q(\Omega) = N(\Omega) - Z\Omega$ , ( $Z\Omega$ ) being the atomic number.

Moreover, the contour plot of the Laplacian function for the atomic system exhibits a shell of charge concentration and another one of charge depletion for each quantum shell. The outer quantum shell of an atom over  $\nabla^2\rho_r < 0$  is called valence shell charge concentration (VSCC). According to some authors, it is convenient to consider the  $-\nabla^2\rho_r$  function for a more intuitive interpretation.<sup>6</sup> For an isolated atom, the VSCC is located at a sphere in which the valence electronic charge is concentrated in a maximum and uniform way.

We carried out an analysis of the changes in the topological properties along the reaction coordinates associated with **TSC-m** and **TSC-D**. Fig. S1 shows the contour lines of the  $-\nabla^2\rho_r$  superimposed on the molecular graphs for selected structures along the reaction paths. The variation of several topological properties ( $\rho_b$ ,  $\nabla^2\rho_b$  and  $\varepsilon$ ) at the selected bcps are displayed in Fig. S2 in which the energy profiles are also included. Fig. S3 shows the changes of the *DI* of selected interactions and Fig. S4 displays the variation of the atomic net charges.

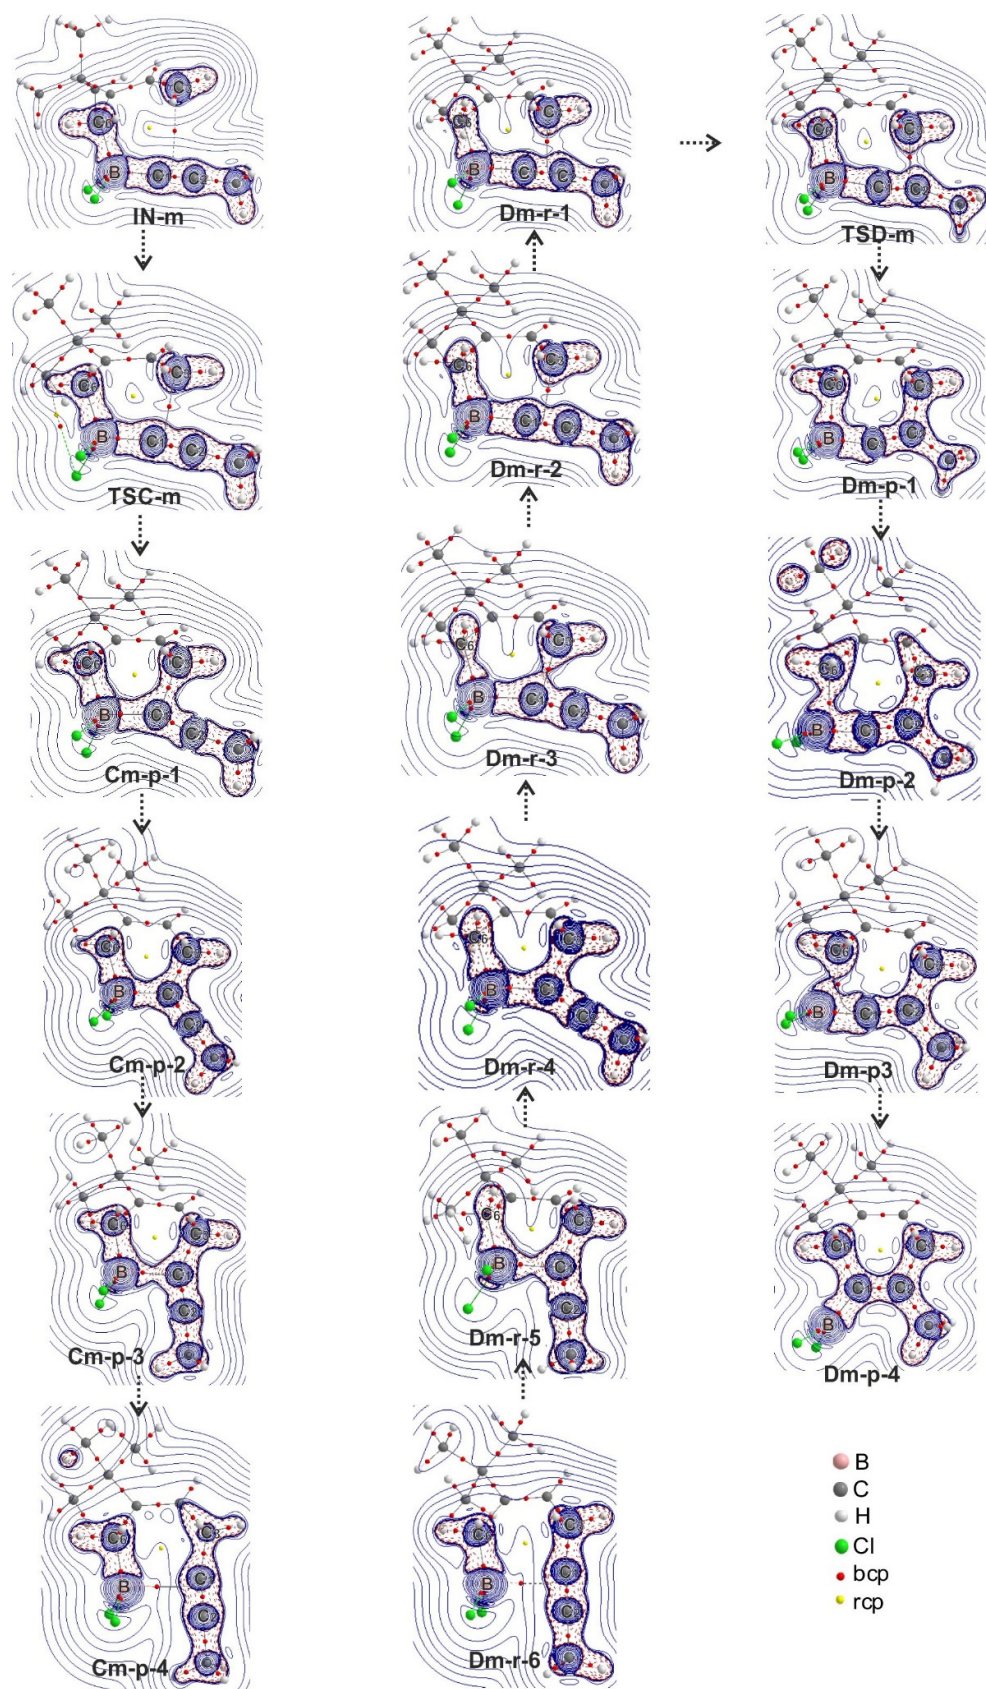

**Fig. S1** Contour plots of  $-\nabla^2\rho_r$  superimposed on the molecular graphs of selected structures along the reaction coordinate associated with **TSC-m** and **TSD-m**. Continuous blue lines and dashed red lines depict regions of local charge density depletion and concentration, respectively.

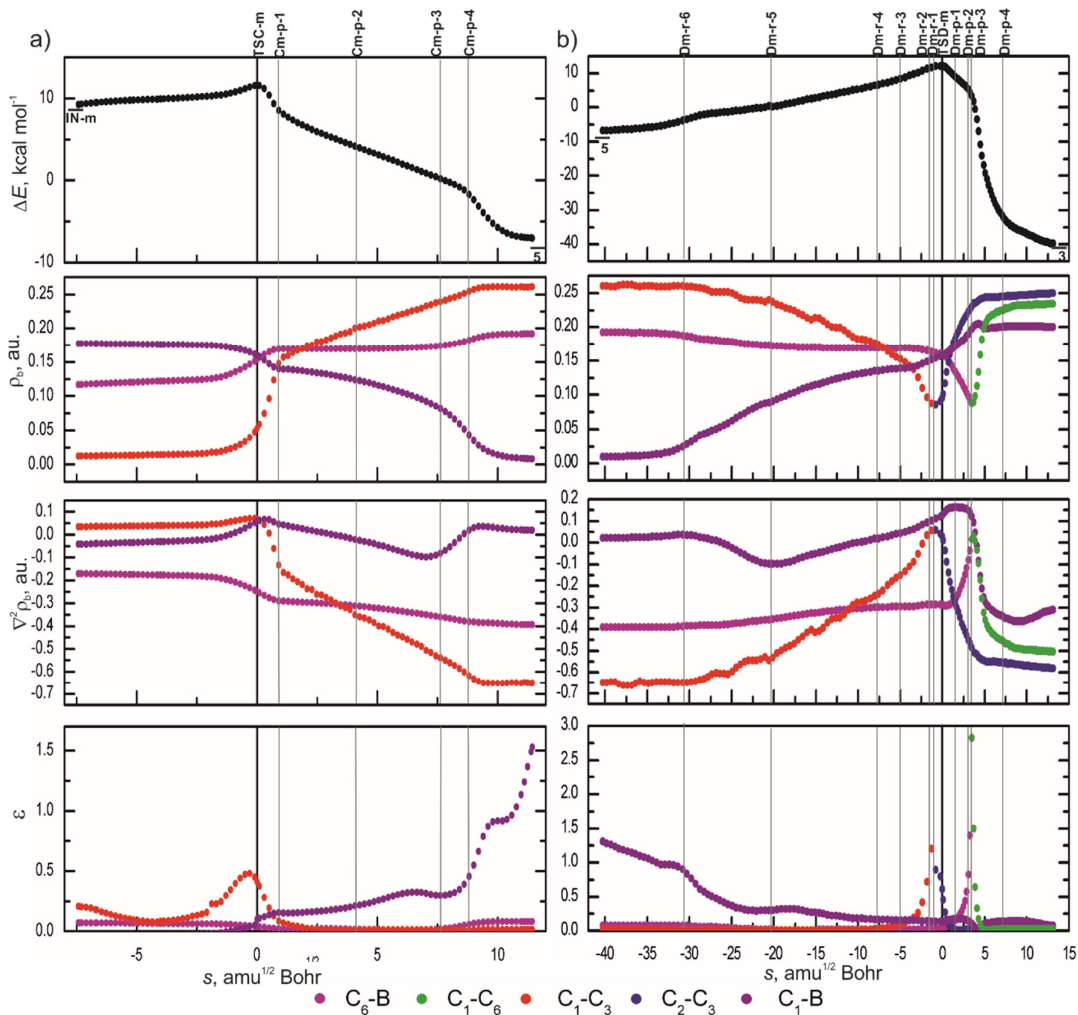

**Fig. S2** Relative energy ( $\Delta E$ ), topological properties ( $\rho_b$ : charge density,  $\nabla^2 \rho_b$ : Laplacian of the charge density and  $\varepsilon$ : ellipticity) along the IRC paths associated with (a) **TSC-m** and (b) **TSD-m**. TSs are located at  $s = 0.0 \text{ amu}^{1/2} \text{ Bohr}$ .

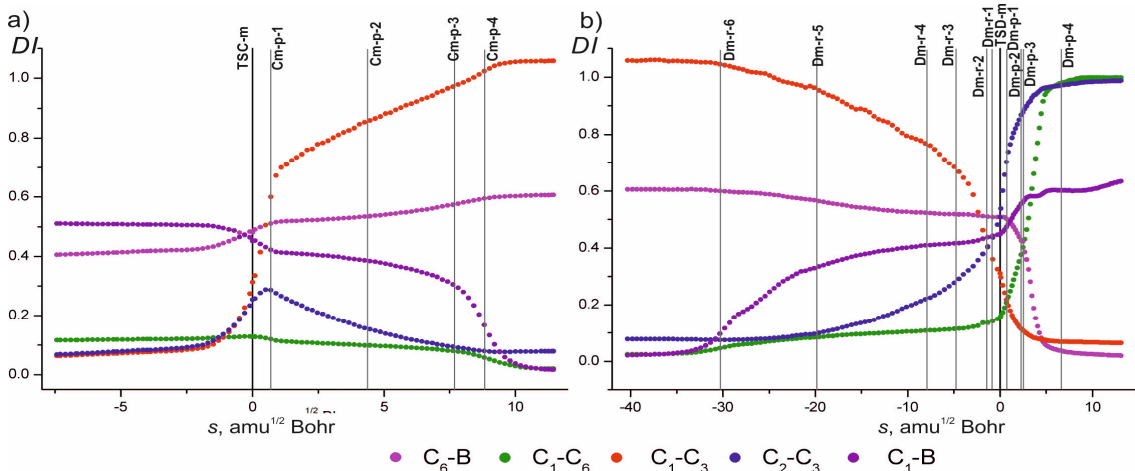

**Fig. S3** Evolution of the delocalization indices ( $DI$ ) along the IRC paths associated with a) **TSC-m** and b) **TSD-m**. TSs are located at  $s = 0.0 \text{ amu}^{1/2} \text{ Bohr}$ .

In the pathway associated with **TSC-m** the topological properties at the C<sub>1</sub>-C<sub>3</sub> and C<sub>1</sub>-B bcps show larger variations. The C<sub>1</sub>-C<sub>3</sub> bond-forming and the C<sub>1</sub>-B bond-breaking begin after **TSC-m**. The topological properties at the C<sub>1</sub>-C<sub>3</sub> bcp show important changes from **TSC-m** to **Cm-p-1** on the IRC, the values of  $\rho_b$  increase from 0.052 au. to 0.147 au.,  $\nabla^2\rho_b$  varies from 0.079 to -0.133 au.,  $\varepsilon$  decreases from 0.42 to 0.08 and  $DI$  C<sub>1</sub>-C<sub>3</sub> increase from 0.31 to 0.67. In this stage of the reaction, the C<sub>1</sub>-C<sub>3</sub> interaction shows features of a shared-shell interaction, and the formation of the C<sub>1</sub>-C<sub>3</sub> covalent bond occurs. In contour plot of the  $-\nabla^2\rho_t$  for **TSC-m** the C<sub>1</sub>-C<sub>3</sub> bcp is localized in a region of the charge depletion while that for **Cm-p-1** it appears in a region of charge concentration (See Fig. S1). After **Cm-p-1**,  $\rho_b$  and  $DI$  at the C<sub>1</sub>-C<sub>3</sub> bcp increase progressively and  $\nabla^2\rho_b$  becomes more negative indicating that the C<sub>1</sub>-C<sub>3</sub> covalent bond is reinforced.

The C<sub>1</sub>-B bond-breaking occurs more delayed.  $\rho_b$  at the C<sub>1</sub>-B bcp decreases from 0.160 au. at **TSC-m** to 0.140 au. at **Cm-p-1**, then this undergoes a smooth and continuous decrease and after **Cm-p-3** the values of  $\rho_b$  fall down abruptly denoting the C<sub>1</sub>-B bond-breaking. Also, from **Cm-p-3** to the end of the reaction  $\varepsilon$  at the C<sub>1</sub>-B bcp increases abruptly reflecting the instability of the C<sub>1</sub>-B interaction. In contour plot of the  $-\nabla^2\rho_t$  for **Cm-p-3**, it can be visualized that the region of charge concentration around the C<sub>1</sub>-B bcp is slimmer while in **Cm-p-4** this bcp is already located in a region of the charge depletion (See Fig. S1).

From **IN-m** to nearly before **TSC-m** the values of  $\rho_b$ ,  $\nabla^2\rho_b$  and  $DI$  at the C<sub>6</sub>-B bcp remain practically constant ( $\rho_b \sim 0.13$  au.,  $\nabla^2\rho_b \sim -0.18$  au. and  $DI \sim 0.4$ ) then,  $\rho_b$  and  $DI$  increase and  $\nabla^2\rho_b$  becomes more negative up to *ca.* 0.18 au., 0.5 and -0.30 au., respectively at **Cm-p-1**. These results demonstrate that the C<sub>6</sub>-B covalent bond is almost formed since an early stage of the reaction.

In the IRC associated with **TSC-D**, from **5** to the TS the topological properties change in a reverse manner than those from **TSC-m** to **5**.  $\rho_b$  and  $DI$  at the C<sub>1</sub>-B bcp increase from values close to zero, up to 0.157 au. and 0.45 at **TSD-m** and, consequently, the C<sub>1</sub>-B bond is formed.

At the C<sub>1</sub>-C<sub>3</sub> bcp,  $\rho_b$  and  $DI$  decrease progressively and  $\nabla^2\rho_b$  becomes less negative while  $\varepsilon$  remains close to zero from enyne **5** until nearly **Dm-r-3**. Also, the contour plots of  $-\nabla^2\rho_t$  show that the charge concentration around the C<sub>1</sub>-C<sub>3</sub> bcp becomes narrower (See Fig. S1). Then after **Dm-r-3**,  $\rho_b$  and  $DI$  at the C<sub>1</sub>-C<sub>3</sub> bcp decrease more sharply,  $\nabla^2\rho_b$  reaches positive values and  $\varepsilon$  begins to increase, which denote an instability of the C<sub>1</sub>-C<sub>3</sub> bonding interaction. At **Dm-r-2**,  $\rho_b$  at C<sub>1</sub>-C<sub>3</sub> bcp is low (0.087 au.),  $\nabla^2\rho_b$  is 0.056 au., and  $\varepsilon$  shows a relatively high value (1.20). Interesting,  $DI$  C<sub>1</sub>-C<sub>3</sub> (0.41) has a similar value to  $DI$  C<sub>2</sub>-C<sub>3</sub> (0.40), indicating that C<sub>1</sub> and C<sub>2</sub> are sharing equivalent amount of electrons with C<sub>3</sub> at **Dm-r-2**. In the following structure, **Dm-r-1**, a sudden change of the topological pattern occurs since the C<sub>1</sub>-C<sub>3</sub> bcp disappears and the C<sub>2</sub>-C<sub>3</sub> bcp appears leading from a six-membered ring to a seven-membered ring structure. At **Dm-r-1**,  $\varepsilon$  decrease significantly (0.79) at the new C<sub>2</sub>-C<sub>3</sub> bcp and the C<sub>2</sub>-C<sub>3</sub> becomes stronger since  $DI$  C<sub>2</sub>-C<sub>3</sub> (0.41) is greater than  $DI$  C<sub>1</sub>-C<sub>3</sub> (0.36). These results suggest that

there is a conflict structure between **Dm-r-2** and **Dm-r-1**, in which  $C_3$  and the  $C_1$ - $C_2$  bcp are connected through a bond path, i.e. wherein  $C_1$  and  $C_2$  are competing to become attached to  $C_3$ .<sup>7</sup> The conflict structure is a key species for the rearrangement of the six-membered ring zwitterion towards the seven-membered zwitterionic structure, which is involved in the pathway for the formation of the cycloadduct. In **TSD-m**, the  $C_6$ -B bcp shows features of a closed shell interaction ( $\rho_b = 0.160$  au.,  $\nabla^2\rho_b = -0.287$  au. and  $DI = 0.51$ ) while the  $C_2$ - $C_3$  interaction displays features of open shell interaction ( $\rho_b$  is 0.095 au.,  $\nabla^2\rho_b = 0.026$  au. and the  $DI = 0.51$ ). In agreement with these results, in the contour plot of  $-\nabla^2\rho$  it can be observed that the  $C_6$ -B/ $C_2$ - $C_3$  bcps are placed in a region of the charge concentration/charge depletion. In addition,  $DI_{C_1-C_6}$  and  $DI_{C_1-C_3}$  are 0.15 and 0.31, respectively indicating that these atoms are sharing their electrons in **TSD-m**. This topological pattern is typical of [4 + 3] TS. Notably, **TSB-m**, which connects with **IN-m** and cycloadduct **3**, has a similar topological pattern to **TSD-m** (two new bcps,  $C_6$ -B and  $C_2$ - $C_3$ , and a ring critical point (rcp) related to the seven-membered cyclic structure) but differs in the values of the topological properties (See Fig. S4). For **TSB-m**,  $\rho_b$  and  $DI$  at the  $C_6$ -B and  $C_2$ - $C_3$  bcps are lower (0.142 au./0.47 and 0.077 au./ 0.46 at the  $C_6$ -B and  $C_2$ - $C_3$  bcps, respectively) than those for **TSD-m**. Also,  $DI_{C_1-C_3}$  is 0.18 indicating that there are less electrons sharing between both atoms in **TSB-m** than in **TSD-m** while that  $DI_{C_1-C_6}$  is 0.18, a little higher than in **TSD-m**. Therefore, the charge density among the atoms of the diene and the dienophile in **TSD-m** is higher due to the proximity to the conflict structure, in which the  $C_1$  and  $C_2$  atoms are closer to  $C_3$  facilitating the sharing of their electrons. Consequently, **TSD-m** is more stabilized.

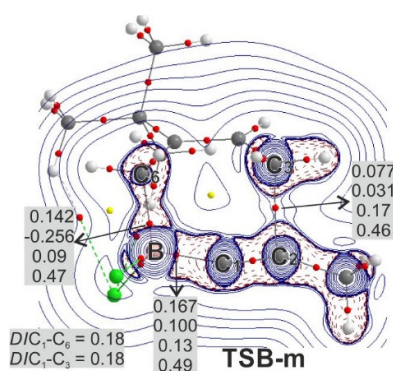

**Fig. S4.** Contour plot of  $-\nabla^2\rho$  superimposed on the molecular graph of **TSB-m**. Continuous blue lines and dashed red lines depict regions of local charge density depletion and concentration, respectively. The values given for selected bcp, from top to bottom, are  $\rho_b$ ,  $\nabla^2\rho_b$ ,  $\epsilon$  and  $DI$ . Also,  $DI$  of other interactions are included. All symbols are explained in the text. See Fig. 1 for key.

After **TSD-m**,  $\rho_b$  and  $DI$  increase abruptly,  $\nabla^2\rho_b$  becomes negative and  $\epsilon$  reaches values close to zero at the  $C_2$ - $C_3$  bcp. At **Dm-p-1**  $\rho_b$  is 0.210 au.,  $\nabla^2\rho_b$  is -0.390 au. and is  $DI$  0.88 denoting the shared-shell nature of the  $C_2$ - $C_3$  interaction which can be also seen in Fig. S1. Hence, at **Dm-p-1** the  $C_2$ - $C_3$  covalent bond is almost completely formed, and it is involved in a seven-membered ring structure. Also, at this point the  $C_1$ - $C_3$  interaction becomes negligible being  $DI_{C_1-C_3}$  close to zero. Then,  $\rho_b$  and  $DI$  at the  $C_2$ -

$C_3$  bcp increase slightly and  $\nabla^2\rho_b$  becomes a little more negative (0.245 au., 0.98, and -0.556 au., respectively) at **Dm-p-4**, closer to the end of the reaction coordinate.

The most important changes from **TSD-m** to cycloadduct **3** occur in the region among  $C_6$ , B and  $C_1$ .  $\rho_b$  and  $DI$  decrease and  $\nabla^2\rho_b$  becomes less negative at the  $C_6$ -B bcp. At **Dm-p-2**,  $\rho_b$  at the  $C_6$ -B bcp is relatively low (0.091 au.),  $\nabla^2\rho_b$  has a small negative value (-0.036 au.) and  $\varepsilon$  increases up to 1.40 reflecting an instability of the  $C_6$ -B bonding interaction and, the asymmetrical distribution of the charge density around the  $C_6$ -B bcp, as it can be seen clearly visualized in the contour plot of  $-\nabla^2\rho_b$  of this structure (See Fig. S1). Suddenly, at **Dm-p-3** the  $C_6$ -B bcp disappears and the  $C_1$ - $C_6$  bcp appears.  $\rho_b$  at the  $C_1$ - $C_6$  bcp is 0.088 au.,  $\nabla^2\rho_b$  is 0.016 au. and  $\varepsilon$  reaches a maximum value of 2.82. Furthermore,  $DI$   $C_1$ - $C_6$  increases (0.61) and  $DI$   $C_6$ -B decreases (0.23). Therefore, an important rearrangement of the charge density occurs between  $C_1$  and  $C_6$  due to the rearrangement of these atoms to form the corresponding  $C_1$ - $C_6$   $\sigma$ -bond. These findings also suggest that the system passes through a conflict structure, in which the B and  $C_1$  atoms are competing to be bound to  $C_6$ .<sup>7</sup> This constitutes a key point in the evolution of the [4 + 3] structure towards the [4 + 2] structure.<sup>8</sup>

After the conflict species, at **Dm-p-4**,  $\rho_b$  at the  $C_1$ - $C_6$  bcp increases,  $\nabla^2\rho_b$  becomes more negative (*ca.* 0.229 au. and -0.478), and  $\varepsilon$  decreases abruptly towards values nearly zero. In this part of the IRC the  $C_1$ - $C_6$  bond is reinforced showing features of a covalent bond. At **Dm-p-4**, both  $C_1$ - $C_6$  and  $C_2$ - $C_3$  covalent bonds are almost completely formed.

The variations of the atomic charges of selected atoms along the reaction coordinates associated with **TSC-m** and **TSD-m** are shown in Fig. S5.

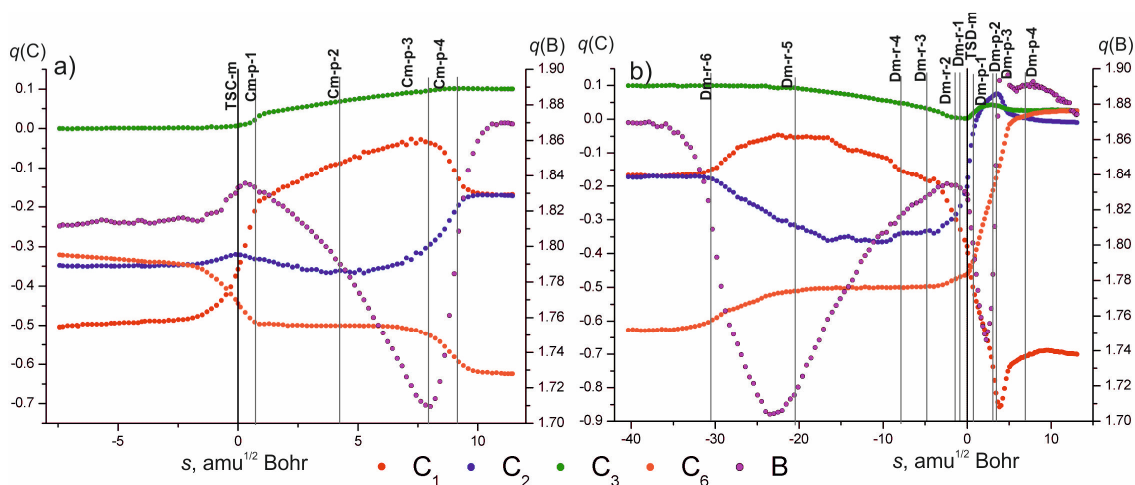

**Fig. S5** Atomic net charges for selected atoms (in  $e$ ) along the reaction coordinates associated with **TSC-m** and **TSD-m**.

In path C, before **TSC-m** the negative charge of  $C_1$  is  $\sim -0.50 e$  then, it changes up to  $-0.03 e$  at **Cm-p-3**. After **Cm-p-3**,  $q(C_1)$  becomes less negative up to  $\sim -0.15 e$  and then remains constant. The electron



charge of C<sub>2</sub> is -0.32 *e* at **TSC-m** and then decreases slightly at **Cm-p-1** (-0.33 *e*) and **Cm-p-2** (-0.36 *e*). From **Cm-p-3** onwards *q*(C<sub>2</sub>) increases reaching similar value *q*(C<sub>1</sub>). Therefore, firstly C<sub>2</sub> gains electron population and C<sub>1</sub> loses electron population after **TSC-m** but after **Cm-p-3**, both atoms exhibit similar net charges. The electron charge of B undergoes remarkable changes during the course of the reaction. At **TSC-m**, *q*(B) is +1.83 *e* then decreases abruptly to a minimum of +1.71 *e* at **Cm-p-3**. The B atom in this stage of the reaction is tetracoordinated. Then, *q*(B) increases (passing by **Cm-p-4** in which *q*(B) = +1.81 *e*) up to a maximum of +1.87 *e*. In this part of the reaction coordinate the C<sub>1</sub>-B bond breaking occurs, and the B atom becomes tricoordinated *q*(C<sub>3</sub>) remains close to zero along the reaction coordinate.

From enyne **5** to **TSD-m**, the changes in the net charges of the analyzed atoms are almost opposite to those observed from **TSC-m** to the enyne. The negative charges of C<sub>1</sub> and C<sub>2</sub> are practically similar (-0.15 and -0.17 *e*, respectively) at **Dm-r-6**. Firstly, *q*(C<sub>1</sub>) and *q*(C<sub>2</sub>) change to -0.05 and -0.30 *e*, respectively at **Dm-r-5**. Then, C<sub>1</sub> increases and C<sub>2</sub> decreases their negative atomic charges becoming similar at **Dm-r-2** (*q*(C<sub>1</sub>) = -0.30 *e* and *q*(C<sub>2</sub>) = -0.28 *e*). After this point, the charges of C<sub>1</sub> and C<sub>2</sub> undergo striking variations. *q*(C<sub>1</sub>) becomes more negative (-0.38, -0.66, -0.78 *e* at **TSD-m**, **Dm-p-1** and **Dm-p-2**, respectively) down to a maximum negative value of -0.82 *e* at **Dm-p-3**, then it falls to ~ -0.70 *e*, remaining constant until the end of the reaction. The negative charge of C<sub>2</sub> decreases becoming positive (+0.06, +0.07 *e* at **Dm-p-1** and **Dm-p-2**, respectively) up to a maximum value of +0.08 *e* at **Dm-p-3**, then it decreases to values close to zero until the final product. The maximum values of *q*(C<sub>1</sub>) and *q*(C<sub>2</sub>) occur at the same point of the reaction coordinate in which the  $\rho_b$  goes down to a minimum,  $\nabla^2\rho_b$  becomes positive and the  $\varepsilon$  is a maximum at the C<sub>6</sub>-B bcp, demonstrating that an important redistribution of the charge density occurs in this stage. In addition, these results reveal that a charge transfer process between C<sub>1</sub> and C<sub>2</sub> occur along the reaction coordinate. The notable variations in the net charges of C<sub>1</sub> and C<sub>2</sub> are attributed to the changes of their hybridization (from “*sp*” in the enyne to “*sp*<sup>2</sup>” hybridization in the cycloadduct).

*q*(B) undergoes significant variations during the course of the reaction. Close to the enyne *q*(B) is +1.87 *e*, then it decreases abruptly to +1.70 *e* (close to **Dm-r-5**). Then, *q*(B) increases to ~ +1.83 *e* near the conflict structure (**Dm-r-1** and **Dm-r-2**). In this part of the reaction coordinate, the boron atom is tricoordinated (in the enyne product) and then the C<sub>1</sub>-B bond formation occurs, becoming tetracoordinated.

At **TSD-m** *q*(B) is +1.83 *e*, then it decreases abruptly up to a minimum of + 1.74 *e* (close to **Dm-p-1**). Afterwards, *q*(B) increases again up to ~ +1.89 *e* at the end of the reaction. In this part of the reaction coordinate, firstly B gain electron population becomes less positive (in this stage the B atom is tetra-coordinate), then the C<sub>6</sub>-B bond begins breaking and the B atom losses electron population, which is donated to C<sub>1</sub> for the formation of the C<sub>1</sub>-C<sub>6</sub>  $\sigma$ -bond. The B atom becomes tricoordinated and its charge gets more positive.

From **TSD-m** afterwards,  $q(C_6)$  undergoes significant changes. The negative charge of  $C_6$  goes sharply from  $-0.46 e$  at **TSD-m** up to  $-0.18 e$  at **Dm-p-3**, and then remains close to zero. These results show that the  $C_6$  loses electron charge, which could be donated to  $C_1$  and/or B, and in this part of the reaction the  $C_6$ -B bond is broken and  $C_6$  begins to form a new bond with  $C_1$ .

B3LYP/6-311++G(d,p) Cartesian coordinates, imaginary frequencies of transition structures, and computed absolute electronic energies (including zero-point energy -ZPE- corrections) and free energy of the stationary points involved in reaction of 2-*tert*-butylbutadiene (**1**) with dichloropropynylborane (**2**).

2-*tert*-butylbutadiene (**1**)

|   |           |           |           |
|---|-----------|-----------|-----------|
| C | -0.767303 | 1.775564  | -0.129730 |
| C | -0.508440 | 0.459776  | -0.127175 |
| C | -1.614550 | -0.511260 | -0.306174 |
| C | -2.842796 | -0.393690 | 0.207422  |
| C | 0.906115  | -0.126777 | 0.029067  |
| H | -1.772981 | 2.143566  | -0.298763 |
| H | 0.000901  | 2.522204  | 0.021069  |
| H | -1.391583 | -1.400762 | -0.890380 |
| H | -3.121924 | 0.441001  | 0.842221  |
| H | -3.604991 | -1.140073 | 0.012919  |
| C | 1.324921  | -0.820649 | -1.290052 |
| C | 0.907958  | -1.164821 | 1.175074  |
| C | 1.951173  | 0.954533  | 0.353012  |
| H | 2.330617  | -1.238867 | -1.185836 |
| H | 1.338068  | -0.106861 | -2.118437 |
| H | 0.655687  | -1.641034 | -1.559139 |
| H | 1.907467  | -1.594243 | 1.292092  |
| H | 0.211556  | -1.984713 | 0.983763  |
| H | 0.625236  | -0.698922 | 2.123635  |
| H | 2.932168  | 0.488137  | 0.478493  |
| H | 1.711459  | 1.483091  | 1.279652  |
| H | 2.035849  | 1.691421  | -0.449946 |

Energy + ZPE = -313.137193 au.

Free Energy = -313.170851 au.

dichloropropynylborane (**2**)

|    |           |           |           |
|----|-----------|-----------|-----------|
| B  | -0.544176 | 0.000135  | -0.000002 |
| C  | 0.946511  | 0.001727  | -0.000012 |
| Cl | -1.459495 | 1.515343  | 0.000002  |
| C  | 2.160481  | 0.003965  | -0.000035 |
| Cl | -1.456543 | -1.516839 | 0.000002  |
| C  | 3.610565  | 0.001938  | -0.000008 |
| H  | 3.989398  | -0.517144 | 0.885061  |
| H  | 4.009198  | 1.019137  | -0.003285 |
| H  | 3.989573  | -0.523024 | -0.881516 |

Energy + ZPE = -1061.459765 au.

Free Energy = -1061.493790 au.

**TSA-m**

1 imaginary frequency : -419.7 cm<sup>-1</sup>

|    |           |           |           |
|----|-----------|-----------|-----------|
| C  | -1.618629 | 0.815785  | 0.261300  |
| C  | -1.310192 | 2.025997  | 0.347421  |
| C  | -1.694641 | 3.316210  | 0.976246  |
| B  | -1.870775 | -0.622918 | 0.131457  |
| Cl | -1.416627 | -1.785248 | 1.431585  |
| Cl | -2.923319 | -1.288255 | -1.174814 |
| H  | -0.877438 | 3.712376  | 1.584513  |
| H  | -1.938197 | 4.066402  | 0.219408  |
| H  | -2.567427 | 3.170118  | 1.615152  |
| C  | 0.253856  | 2.511894  | -0.825955 |
| C  | 1.306256  | 1.695628  | -0.424493 |
| C  | 1.361340  | 0.294237  | -0.642438 |
| C  | 0.339092  | -0.303335 | -1.340201 |
| C  | 2.505070  | -0.508114 | 0.011891  |
| C  | 2.412278  | -2.011535 | -0.302711 |
| C  | 3.851814  | 0.019806  | -0.536469 |
| C  | 2.471913  | -0.331283 | 1.548369  |
| H  | 0.340596  | 3.571324  | -0.614122 |
| H  | -0.300555 | 2.288672  | -1.729278 |
| H  | 2.042584  | 2.137391  | 0.238499  |
| H  | 0.294276  | -1.374116 | -1.481282 |
| H  | -0.328676 | 0.274254  | -1.961947 |
| H  | 1.495892  | -2.455062 | 0.094792  |
| H  | 3.256849  | -2.531728 | 0.156568  |
| H  | 2.449567  | -2.203345 | -1.378651 |
| H  | 4.680550  | -0.532501 | -0.083715 |
| H  | 3.998153  | 1.079466  | -0.313675 |
| H  | 3.909802  | -0.108756 | -1.621018 |
| H  | 1.528693  | -0.694338 | 1.963889  |
| H  | 2.592789  | 0.713111  | 1.845315  |
| H  | 3.286537  | -0.900872 | 2.005393  |

Energy + ZPE = -1374.563093 au.

Free Energy = -1374.607669 au.

**TSA-p**

1 imaginary frequency : -414.3 cm<sup>-1</sup>

|    |           |           |           |
|----|-----------|-----------|-----------|
| C  | -1.256982 | 0.992434  | 0.231024  |
| C  | -0.260570 | 1.750328  | 0.222687  |
| C  | 0.283471  | 3.009510  | 0.793686  |
| B  | -2.346515 | 0.013175  | 0.224780  |
| Cl | -2.504558 | -1.232429 | 1.518637  |
| Cl | -3.750582 | 0.153281  | -0.899318 |
| H  | 0.503987  | 3.736746  | 0.008035  |

|   |           |           |           |
|---|-----------|-----------|-----------|
| H | -0.445747 | 3.447882  | 1.477577  |
| H | 1.209433  | 2.824916  | 1.344104  |
| C | 1.181190  | 1.160441  | -1.084454 |
| C | 1.550983  | -0.134376 | -0.717806 |
| C | 0.625345  | -1.191370 | -0.940178 |
| C | -0.599695 | -1.039094 | -1.524496 |
| C | 2.829974  | -0.437570 | 0.080037  |
| C | 3.608692  | -1.568399 | -0.635526 |
| C | 3.762302  | 0.782613  | 0.189081  |
| C | 2.457774  | -0.898284 | 1.511527  |
| H | 1.893312  | 1.964415  | -0.962628 |
| H | 0.512499  | 1.298280  | -1.924148 |
| H | 0.849491  | -2.160935 | -0.508322 |
| H | -1.280710 | -1.879808 | -1.584544 |
| H | -0.861212 | -0.175844 | -2.119822 |
| H | 4.522704  | -1.795283 | -0.079175 |
| H | 3.892785  | -1.267182 | -1.647583 |
| H | 3.027390  | -2.489936 | -0.707287 |
| H | 3.303169  | 1.606570  | 0.740861  |
| H | 4.062797  | 1.152497  | -0.795113 |
| H | 4.669739  | 0.497549  | 0.727504  |
| H | 1.904604  | -0.119308 | 2.042536  |
| H | 3.367283  | -1.117171 | 2.078739  |
| H | 1.843515  | -1.801154 | 1.503450  |

Energy + ZPE = -1374.563762 au.  
Free Energy = -1374.608561 au.

#### IN-m

|   |           |           |           |
|---|-----------|-----------|-----------|
| C | 1.299498  | 0.469636  | -0.613831 |
| C | 1.125857  | 1.897824  | -0.642632 |
| C | 0.114739  | 2.536506  | -1.268898 |
| C | 0.275667  | -0.395383 | -1.096546 |
| C | 2.604117  | -0.051372 | -0.023581 |
| C | 2.734440  | 0.400160  | 1.457780  |
| C | 2.741441  | -1.582433 | -0.091398 |
| C | 3.765547  | 0.575150  | -0.849852 |
| H | 1.847001  | 2.501162  | -0.105974 |
| H | 0.025551  | 3.614668  | -1.203119 |
| H | -0.612061 | 2.031326  | -1.889510 |
| H | -0.288133 | 0.023893  | -1.927679 |
| H | 0.604689  | -1.407416 | -1.306741 |
| H | 1.934176  | -0.021878 | 2.066838  |
| H | 3.690198  | 0.038588  | 1.844997  |
| H | 2.720593  | 1.485558  | 1.567133  |
| H | 2.733312  | -1.943476 | -1.123032 |
| H | 3.698861  | -1.870545 | 0.348719  |
| H | 1.951523  | -2.088137 | 0.464080  |
| H | 3.691083  | 0.302682  | -1.905494 |
| H | 3.796160  | 1.662941  | -0.774978 |
| H | 4.710143  | 0.184080  | -0.463630 |
| C | -2.366804 | 1.748538  | 0.558403  |

|    |           |           |           |
|----|-----------|-----------|-----------|
| C  | -1.807207 | 0.698145  | 0.317933  |
| B  | -1.093872 | -0.629638 | 0.012884  |
| C  | -3.070615 | 2.984632  | 0.875361  |
| Cl | -2.222988 | -1.816000 | -0.959377 |
| Cl | -0.526170 | -1.504084 | 1.592170  |
| H  | -2.432457 | 3.670370  | 1.439714  |
| H  | -3.958284 | 2.778426  | 1.480371  |
| H  | -3.398462 | 3.497255  | -0.033356 |

Energy + ZPE = -1374.580216 au.  
Free Energy = -1374.626536 au.

#### IN-p

|    |           |           |           |
|----|-----------|-----------|-----------|
| C  | -0.737929 | -1.079278 | -1.238727 |
| C  | 0.529199  | -1.088556 | -0.654495 |
| C  | 1.566126  | -0.093884 | -0.744424 |
| C  | 2.846998  | -0.315554 | 0.081973  |
| C  | 1.350966  | 0.999584  | -1.513977 |
| C  | 2.487882  | -0.360414 | 1.585435  |
| C  | 3.870906  | 0.809929  | -0.142476 |
| C  | 3.496268  | -1.654775 | -0.340459 |
| H  | -0.907663 | -0.440575 | -2.099016 |
| H  | -1.212946 | -2.054093 | -1.306486 |
| H  | 0.721710  | -1.916443 | 0.021397  |
| H  | 2.066819  | 1.807355  | -1.579683 |
| H  | 0.453557  | 1.113363  | -2.106403 |
| H  | 3.391832  | -0.529834 | 2.176781  |
| H  | 2.040358  | 0.582974  | 1.908404  |
| H  | 1.785511  | -1.163201 | 1.822355  |
| H  | 4.769564  | 0.604107  | 0.443736  |
| H  | 4.170030  | 0.884296  | -1.191744 |
| H  | 3.485561  | 1.781782  | 0.177265  |
| H  | 4.407493  | -1.822560 | 0.239949  |
| H  | 2.838811  | -2.510944 | -0.168389 |
| H  | 3.765471  | -1.642114 | -1.400187 |
| B  | -1.896320 | -0.310431 | 0.001617  |
| C  | -1.487804 | 1.146410  | 0.226915  |
| C  | -1.147215 | 2.300007  | 0.386899  |
| C  | -0.773955 | 3.690342  | 0.610180  |
| Cl | -3.554152 | -0.475247 | -0.870156 |
| Cl | -1.873618 | -1.375334 | 1.546480  |
| H  | 0.225927  | 3.766981  | 1.046097  |
| H  | -0.780028 | 4.255357  | -0.326094 |
| H  | -1.476977 | 4.172712  | 1.295359  |

Energy + ZPE = -1374.578911 au.  
Free Energy = -1374.626085 au.

#### TS-m

1 imaginary frequency : -252.1 cm<sup>-1</sup>

|   |          |          |           |
|---|----------|----------|-----------|
| C | 1.193557 | 0.532375 | -0.550043 |
|---|----------|----------|-----------|

|    |           |           |           |
|----|-----------|-----------|-----------|
| C  | 0.915953  | 1.959860  | -0.432611 |
| C  | -0.000629 | 2.642981  | -1.136408 |
| C  | 0.320336  | -0.308334 | -1.213308 |
| C  | 2.492138  | 0.037426  | 0.095568  |
| C  | 2.476050  | 0.313589  | 1.621398  |
| C  | 2.742900  | -1.463569 | -0.134154 |
| C  | 3.665246  | 0.823798  | -0.550231 |
| H  | 1.507793  | 2.513292  | 0.286855  |
| H  | -0.145777 | 3.703101  | -0.964573 |
| H  | -0.605941 | 2.193712  | -1.913614 |
| H  | -0.392728 | 0.132294  | -1.898762 |
| H  | 0.644062  | -1.309049 | -1.463257 |
| H  | 1.657503  | -0.217015 | 2.109936  |
| H  | 3.416888  | -0.036578 | 2.054295  |
| H  | 2.383636  | 1.376595  | 1.851559  |
| H  | 2.828554  | -1.700322 | -1.198031 |
| H  | 3.685534  | -1.744994 | 0.341563  |
| H  | 1.954824  | -2.081704 | 0.297560  |
| H  | 3.699183  | 0.662083  | -1.630887 |
| H  | 3.598853  | 1.897786  | -0.367122 |
| H  | 4.607350  | 0.468987  | -0.123775 |
| C  | -2.584788 | 1.454891  | 0.548912  |
| C  | -2.014162 | 0.413087  | 0.301940  |
| B  | -1.305066 | -0.889692 | -0.009899 |
| C  | -3.297782 | 2.682613  | 0.870035  |
| Cl | -2.150636 | -1.994624 | -1.226458 |
| Cl | -0.631187 | -1.827213 | 1.418559  |
| H  | -2.663785 | 3.369503  | 1.437158  |
| H  | -4.182557 | 2.464771  | 1.475203  |
| H  | -3.629975 | 3.194918  | -0.036933 |

Energy + ZPE = -1374.579328 au.  
Free Energy = -1374.625992 au.

#### TS-p

1 imaginary frequency : -185.9 cm<sup>-1</sup>

|   |           |           |           |
|---|-----------|-----------|-----------|
| C | -0.717369 | -1.077529 | -1.313733 |
| C | 0.518642  | -1.093316 | -0.703447 |
| C | 1.570263  | -0.097032 | -0.767961 |
| C | 2.823905  | -0.337696 | 0.094257  |
| C | 1.401826  | 0.991547  | -1.548838 |
| C | 2.421381  | -0.392273 | 1.586527  |
| C | 3.866154  | 0.778754  | -0.086431 |
| C | 3.475497  | -1.679240 | -0.318616 |
| H | -0.919096 | -0.390743 | -2.126893 |
| H | -1.250893 | -2.020431 | -1.356221 |
| H | 0.698354  | -1.930005 | -0.035554 |
| H | 2.139523  | 1.779845  | -1.605293 |
| H | 0.520807  | 1.122588  | -2.162846 |
| H | 3.305843  | -0.578811 | 2.202015  |
| H | 1.977348  | 0.554033  | 1.905822  |
| H | 1.702158  | -1.187541 | 1.796013  |

|    |           |           |           |
|----|-----------|-----------|-----------|
| H  | 4.741011  | 0.561646  | 0.531221  |
| H  | 4.203740  | 0.855842  | -1.123668 |
| H  | 3.477502  | 1.752410  | 0.223738  |
| H  | 4.367564  | -1.859169 | 0.287628  |
| H  | 2.806481  | -2.531408 | -0.174401 |
| H  | 3.776727  | -1.660057 | -1.369642 |
| B  | -1.954732 | -0.268100 | 0.054509  |
| C  | -1.479891 | 1.161686  | 0.256062  |
| C  | -1.094248 | 2.302502  | 0.402760  |
| C  | -0.663860 | 3.678054  | 0.608787  |
| Cl | -3.562667 | -0.427080 | -0.859568 |
| Cl | -1.899166 | -1.377964 | 1.534969  |
| H  | 0.330613  | 3.717758  | 1.061452  |
| H  | -0.629499 | 4.225627  | -0.337046 |
| H  | -1.357170 | 4.201921  | 1.273100  |

Energy + ZPE = -1374.579419 au.  
Free Energy = -1374.626736 au.

#### TSB-m

1 imaginary frequency : -269.1 cm<sup>-1</sup>

|    |           |           |           |
|----|-----------|-----------|-----------|
| C  | 1.138490  | 0.391035  | -0.563050 |
| C  | 0.774826  | 1.715403  | -0.535099 |
| C  | -0.493922 | 2.170081  | -0.991525 |
| C  | 0.151286  | -0.594003 | -1.048613 |
| C  | 2.513487  | -0.023471 | -0.008597 |
| C  | -1.983630 | 1.790158  | 0.324368  |
| C  | -1.813784 | 0.569467  | 0.203431  |
| B  | -1.210561 | -0.825818 | -0.075693 |
| C  | -2.596122 | 3.027747  | 0.827252  |
| Cl | -2.420972 | -1.931524 | -1.039968 |
| Cl | -0.761275 | -1.680946 | 1.560504  |
| C  | 2.605963  | 0.355893  | 1.491005  |
| C  | 2.783736  | -1.533411 | -0.142658 |
| C  | 3.611482  | 0.735184  | -0.795694 |
| H  | 1.414767  | 2.447218  | -0.056619 |
| H  | -0.685824 | 3.235974  | -0.927557 |
| H  | -0.944660 | 1.709869  | -1.861012 |
| H  | -0.281828 | -0.271391 | -1.999461 |
| H  | 0.569233  | -1.588393 | -1.188467 |
| H  | -1.854856 | 3.647894  | 1.336918  |
| H  | -3.389053 | 2.778684  | 1.534347  |
| H  | -3.029007 | 3.610541  | 0.010566  |
| H  | 1.830859  | -0.151236 | 2.069532  |
| H  | 3.580969  | 0.053451  | 1.883858  |
| H  | 2.500855  | 1.431698  | 1.645031  |
| H  | 2.771695  | -1.858429 | -1.186492 |
| H  | 3.775366  | -1.755656 | 0.259923  |
| H  | 2.057594  | -2.128824 | 0.414439  |
| H  | 3.567606  | 0.495303  | -1.861625 |
| H  | 3.519609  | 1.817730  | -0.687034 |
| H  | 4.596799  | 0.442144  | -0.421923 |

Energy + ZPE = -1374.570257 au.

Free Energy = -1374.613635 au.

### TSB-p

1 imaginary frequency : -207.1 cm<sup>-1</sup>

|    |           |           |           |
|----|-----------|-----------|-----------|
| C  | 0.888434  | 0.996766  | -1.057300 |
| C  | 1.320950  | -0.292429 | -0.612209 |
| C  | 0.416949  | -1.316759 | -0.706423 |
| C  | -0.972757 | -1.148833 | -1.147470 |
| C  | 2.724668  | -0.443083 | 0.007160  |
| C  | 3.788910  | -0.063791 | -1.049517 |
| C  | 2.994982  | -1.886317 | 0.467383  |
| C  | 2.863642  | 0.490226  | 1.231124  |
| B  | -1.896327 | -0.263985 | -0.064171 |
| Cl | -2.087277 | -1.206289 | 1.579535  |
| C  | -1.169534 | 1.085327  | 0.172140  |
| C  | -0.409271 | 2.050508  | 0.277570  |
| C  | 0.132588  | 3.358862  | 0.648451  |
| Cl | -3.613316 | 0.018222  | -0.827471 |
| H  | 1.567825  | 1.836307  | -0.969485 |
| H  | 0.227487  | 1.067672  | -1.909519 |
| H  | 0.693235  | -2.290220 | -0.319601 |
| H  | -1.048918 | -0.589058 | -2.084559 |
| H  | -1.475191 | -2.109171 | -1.272739 |
| H  | 3.727000  | -0.722571 | -1.920105 |
| H  | 3.672305  | 0.966299  | -1.397473 |
| H  | 4.791946  | -0.156027 | -0.623255 |
| H  | 2.304265  | -2.199318 | 1.254705  |
| H  | 2.923634  | -2.598867 | -0.358966 |
| H  | 4.008589  | -1.951380 | 0.870691  |
| H  | 2.115359  | 0.257164  | 1.992872  |
| H  | 3.854102  | 0.368944  | 1.678531  |
| H  | 2.760929  | 1.543614  | 0.959496  |
| H  | 1.054707  | 3.258992  | 1.225141  |
| H  | -0.601052 | 3.886680  | 1.261621  |
| H  | 0.338113  | 3.965143  | -0.237027 |

Energy + ZPE = -1374.569665 au.

Free Energy = -1374.613757 au.

### TSC-m

1 imaginary frequency : -167.3 cm<sup>-1</sup>

|    |           |           |           |
|----|-----------|-----------|-----------|
| Cl | -0.862069 | -1.593496 | 1.632641  |
| B  | -1.081445 | -0.823138 | -0.101304 |
| C  | 0.364871  | -0.679608 | -0.896527 |
| C  | 1.234521  | 0.433003  | -0.437627 |
| C  | 2.653529  | 0.152508  | 0.048570  |
| C  | 0.713488  | 1.708274  | -0.455547 |
| C  | -0.543347 | 1.992157  | -1.026712 |
| C  | -1.812307 | 0.559034  | 0.069346  |

|    |           |           |           |
|----|-----------|-----------|-----------|
| C  | -2.471379 | 1.559482  | 0.330979  |
| C  | -3.295280 | 2.704185  | 0.674727  |
| Cl | -2.196131 | -1.995542 | -1.132769 |
| C  | 3.368075  | 1.410191  | 0.575260  |
| C  | 2.662065  | -0.918110 | 1.164016  |
| C  | 3.448977  | -0.383096 | -1.174599 |
| H  | 0.066786  | -0.492467 | -1.935562 |
| H  | 0.872924  | -1.642618 | -0.878337 |
| H  | 1.225001  | 2.521017  | 0.042606  |
| H  | -0.934831 | 2.999106  | -0.941464 |
| H  | -0.896997 | 1.452942  | -1.895062 |
| H  | -3.705660 | 3.182389  | -0.218438 |
| H  | -4.135005 | 2.367645  | 1.290521  |
| H  | -2.731238 | 3.443650  | 1.248957  |
| H  | 4.382616  | 1.144701  | 0.881664  |
| H  | 3.447490  | 2.187330  | -0.189144 |
| H  | 2.860015  | 1.831390  | 1.446896  |
| H  | 3.697339  | -1.122588 | 1.450310  |
| H  | 2.124121  | -0.570907 | 2.048403  |
| H  | 2.210280  | -1.857308 | 0.843756  |
| H  | 4.479530  | -0.585309 | -0.870415 |
| H  | 3.024173  | -1.310107 | -1.564078 |
| H  | 3.470802  | 0.352353  | -1.983241 |

Energy + ZPE = -1374.573811 au.

Free Energy = -1374.618053 au.

### TSC-p

1 imaginary frequency : -171.6 cm<sup>-1</sup>

|    |           |           |           |
|----|-----------|-----------|-----------|
| C  | -0.912813 | -1.350530 | -1.120011 |
| B  | -1.778482 | -0.378581 | -0.097140 |
| C  | -1.091579 | 1.031859  | 0.027047  |
| C  | -0.680784 | 2.168843  | 0.237303  |
| C  | -0.283128 | 3.536333  | 0.515945  |
| C  | 0.493270  | -1.426976 | -0.692906 |
| C  | 1.321031  | -0.336106 | -0.628150 |
| C  | 2.717099  | -0.346633 | 0.025292  |
| C  | 0.794354  | 0.890452  | -1.126968 |
| Cl | -3.543701 | -0.168280 | -0.782179 |
| Cl | -1.882229 | -1.168003 | 1.642273  |
| C  | 2.713297  | 0.571699  | 1.268663  |
| C  | 3.762903  | 0.167434  | -0.991372 |
| C  | 3.126496  | -1.762995 | 0.464036  |
| H  | -1.016108 | -0.879088 | -2.104025 |
| H  | -1.376756 | -2.336305 | -1.162594 |
| H  | 0.607342  | 3.577780  | 1.147845  |
| H  | -0.095693 | 4.091066  | -0.407251 |
| H  | -1.098258 | 4.038522  | 1.046363  |
| H  | 0.837723  | -2.368927 | -0.282694 |
| H  | 1.369937  | 1.801452  | -1.018797 |
| H  | 0.141368  | 0.889529  | -1.988153 |
| H  | 3.701723  | 0.566495  | 1.736594  |

|   |          |           |           |
|---|----------|-----------|-----------|
| H | 2.480860 | 1.608667  | 1.013319  |
| H | 1.983408 | 0.231171  | 2.007327  |
| H | 4.758417 | 0.169499  | -0.538619 |
| H | 3.793937 | -0.472355 | -1.877701 |
| H | 3.549229 | 1.188478  | -1.319309 |
| H | 4.135949 | -1.734197 | 0.881769  |
| H | 2.461256 | -2.161179 | 1.234471  |
| H | 3.138013 | -2.461168 | -0.377708 |

Energy + ZPE = -1374.570099 au.

Free Energy = -1374.613933 au.

### TSD-m

1 imaginary frequency : -168.6 cm<sup>-1</sup>

|    |           |           |           |
|----|-----------|-----------|-----------|
| Cl | -1.067117 | -1.569516 | 1.660485  |
| B  | -1.187991 | -0.818685 | -0.087426 |
| C  | 0.265229  | -0.760962 | -0.856226 |
| C  | 1.201125  | 0.341829  | -0.446385 |
| C  | 2.616808  | -0.007463 | 0.023220  |
| C  | 0.758752  | 1.622079  | -0.519281 |
| C  | -0.563590 | 1.950810  | -1.029833 |
| C  | -1.758124 | 0.631738  | 0.087359  |
| C  | -2.012549 | 1.829460  | 0.255451  |
| C  | -2.598885 | 3.082196  | 0.731224  |
| Cl | -2.404621 | -1.871262 | -1.117377 |
| C  | 3.424997  | 1.232358  | 0.447592  |
| C  | 2.564117  | -0.982314 | 1.222475  |
| C  | 3.359060  | -0.689143 | -1.154805 |
| H  | 0.015484  | -0.633277 | -1.916780 |
| H  | 0.725480  | -1.745020 | -0.763938 |
| H  | 1.357595  | 2.448367  | -0.161441 |
| H  | -0.782336 | 3.012876  | -1.107492 |
| H  | -0.909565 | 1.432166  | -1.917362 |
| H  | -3.054363 | 3.639536  | -0.090463 |
| H  | -3.371509 | 2.851899  | 1.467227  |
| H  | -1.840146 | 3.709630  | 1.204806  |
| H  | 4.425913  | 0.922645  | 0.758877  |
| H  | 3.540553  | 1.945305  | -0.372950 |
| H  | 2.961577  | 1.749354  | 1.292255  |
| H  | 3.583408  | -1.239863 | 1.524337  |
| H  | 2.059921  | -0.526803 | 2.078013  |
| H  | 2.042158  | -1.909441 | 0.982101  |
| H  | 4.374071  | -0.953854 | -0.845129 |
| H  | 2.858911  | -1.604077 | -1.478483 |
| H  | 3.430700  | -0.016303 | -2.014028 |

Energy + ZPE = -1374.572152 au.

Free Energy = 1374.615483 au.

3

|    |           |           |           |
|----|-----------|-----------|-----------|
| C  | -0.904294 | 0.326578  | 0.032483  |
| C  | -0.915408 | 1.659178  | -0.208398 |
| C  | -2.120352 | 2.479280  | -0.585298 |
| B  | -2.158261 | -0.569572 | 0.016478  |
| Cl | -3.699835 | -0.165666 | 0.809877  |
| Cl | -2.115702 | -2.190280 | -0.729583 |
| H  | -3.038824 | 1.907114  | -0.679845 |
| H  | -2.282990 | 3.271330  | 0.154948  |
| H  | -1.933608 | 2.983029  | -1.540000 |
| C  | 0.354079  | 2.472930  | -0.155110 |
| C  | 1.628503  | 1.681827  | -0.111358 |
| C  | 1.681551  | 0.365140  | 0.098209  |
| C  | 0.402360  | -0.405044 | 0.349222  |
| C  | 2.990762  | -0.441197 | 0.105770  |
| C  | 3.025648  | -1.383756 | -1.122740 |
| C  | 4.232952  | 0.466218  | 0.042691  |
| C  | 3.083767  | -1.291926 | 1.394838  |
| H  | 0.291283  | 3.140407  | 0.719940  |
| H  | 0.374653  | 3.158192  | -1.012825 |
| H  | 2.534898  | 2.253738  | -0.272652 |
| H  | 0.375706  | -0.711189 | 1.404542  |
| H  | 0.423835  | -1.345957 | -0.206699 |
| H  | 2.199489  | -2.098618 | -1.118788 |
| H  | 3.956710  | -1.958825 | -1.127746 |
| H  | 2.975230  | -0.811215 | -2.053104 |
| H  | 5.136876  | -0.148336 | 0.072993  |
| H  | 4.269567  | 1.158115  | 0.888722  |
| H  | 4.264163  | 1.051759  | -0.879901 |
| H  | 2.279286  | -2.027931 | 1.460230  |
| H  | 3.040284  | -0.660032 | 2.287088  |
| H  | 4.031473  | -1.838000 | 1.413864  |

Energy + ZPE = -1374.650951 au.

Free Energy = -1374.696053 au.

4

|    |           |           |           |
|----|-----------|-----------|-----------|
| C  | 1.086861  | -0.106527 | -0.157113 |
| C  | 0.378621  | 1.016806  | -0.437104 |
| C  | 0.943718  | 2.396268  | -0.650757 |
| B  | 2.606500  | -0.170914 | 0.050399  |
| Cl | 3.503751  | -1.655907 | -0.378290 |
| Cl | 3.607959  | 1.097604  | 0.797157  |
| H  | 0.447496  | 2.862427  | -1.508210 |
| H  | 0.725877  | 3.030900  | 0.216393  |
| H  | 2.015426  | 2.416075  | -0.825008 |
| C  | -1.121620 | 0.980851  | -0.633479 |
| C  | -1.835868 | -0.234677 | -0.084805 |
| C  | -1.125340 | -1.340393 | 0.146740  |
| C  | 0.356191  | -1.447531 | -0.074180 |
| C  | -3.346423 | -0.115010 | 0.158587  |
| C  | -3.983544 | -1.465932 | 0.530234  |
| C  | -3.608164 | 0.873680  | 1.321374  |

|   |           |           |           |
|---|-----------|-----------|-----------|
| C | -4.044046 | 0.411136  | -1.118274 |
| H | -1.313047 | 1.071229  | -1.713980 |
| H | -1.537098 | 1.902168  | -0.209843 |
| H | -1.605539 | -2.240027 | 0.514783  |
| H | 0.553056  | -2.021807 | -0.991646 |
| H | 0.788448  | -2.058060 | 0.726053  |
| H | -5.060017 | -1.336497 | 0.672762  |
| H | -3.574326 | -1.867428 | 1.461131  |
| H | -3.837081 | -2.210466 | -0.257100 |
| H | -3.221229 | 1.873465  | 1.109940  |
| H | -3.143402 | 0.518447  | 2.245246  |
| H | -4.684007 | 0.969664  | 1.497103  |
| H | -3.691609 | 1.406215  | -1.400220 |
| H | -5.123355 | 0.479166  | -0.953456 |
| H | -3.873485 | -0.261791 | -1.964012 |

Energy + ZPE = -1374.652288 au.  
Free Energy = -1374.696881 au.

### 5

|    |           |           |           |
|----|-----------|-----------|-----------|
| C  | 1.086861  | -0.106527 | -0.157113 |
| C  | 0.378621  | 1.016806  | -0.437104 |
| C  | 0.943718  | 2.396268  | -0.650757 |
| B  | 2.606500  | -0.170914 | 0.050399  |
| Cl | 3.503751  | -1.655907 | -0.378290 |
| Cl | 3.607959  | 1.097604  | 0.797157  |
| H  | 0.447496  | 2.862427  | -1.508210 |
| H  | 0.725877  | 3.030900  | 0.216393  |
| H  | 2.015426  | 2.416075  | -0.825008 |
| C  | -1.121620 | 0.980851  | -0.633479 |
| C  | -1.835868 | -0.234677 | -0.084805 |
| C  | -1.125340 | -1.340393 | 0.146740  |
| C  | 0.356191  | -1.447531 | -0.074180 |
| C  | -3.346423 | -0.115010 | 0.158587  |
| C  | -3.983544 | -1.465932 | 0.530234  |
| C  | -3.608164 | 0.873680  | 1.321374  |
| C  | -4.044046 | 0.411136  | -1.118274 |
| H  | -1.313047 | 1.071229  | -1.713980 |
| H  | -1.537098 | 1.902168  | -0.209843 |
| H  | -1.605539 | -2.240027 | 0.514783  |
| H  | 0.553056  | -2.021807 | -0.991646 |
| H  | 0.788448  | -2.058060 | 0.726053  |
| H  | -5.060017 | -1.336497 | 0.672762  |
| H  | -3.574326 | -1.867428 | 1.461131  |
| H  | -3.837081 | -2.210466 | -0.257100 |
| H  | -3.221229 | 1.873465  | 1.109940  |
| H  | -3.143402 | 0.518447  | 2.245246  |
| H  | -4.684007 | 0.969664  | 1.497103  |
| H  | -3.691609 | 1.406215  | -1.400220 |
| H  | -5.123355 | 0.479166  | -0.953456 |
| H  | -3.873485 | -0.261791 | -1.964012 |

Energy + ZPE = -1374.652288 au.  
Free Energy = -1374.696881 au.

### 6

|    |           |           |           |
|----|-----------|-----------|-----------|
| C  | -0.724258 | -1.259080 | -1.137003 |
| C  | 0.653185  | -1.221675 | -0.524749 |
| B  | -1.933696 | -0.998746 | -0.180774 |
| C  | 1.480976  | -0.169979 | -0.524838 |
| Cl | -3.526054 | -0.585540 | -0.850266 |
| Cl | -1.840964 | -1.219240 | 1.572878  |
| C  | 2.874407  | -0.189454 | 0.120373  |
| C  | 1.046277  | 1.141747  | -1.193384 |
| C  | -0.044198 | 1.822942  | -0.489556 |
| C  | -0.945298 | 2.373641  | 0.093908  |
| C  | -2.031004 | 3.041597  | 0.804930  |
| H  | -0.911552 | -2.266328 | -1.544487 |
| H  | -0.818192 | -0.589102 | -1.997115 |
| H  | 0.960461  | -2.137049 | -0.033589 |
| C  | 3.180842  | -1.527469 | 0.816961  |
| C  | 3.952540  | 0.037300  | -0.968000 |
| C  | 2.972643  | 0.935221  | 1.179445  |
| H  | 0.733475  | 0.940928  | -2.224952 |
| H  | 1.892267  | 1.826600  | -1.276327 |
| H  | -1.718329 | 4.024981  | 1.167132  |
| H  | -2.353509 | 2.454036  | 1.669276  |
| H  | -2.899214 | 3.184538  | 0.155572  |
| H  | 2.237172  | 0.786465  | 1.974747  |
| H  | 2.807528  | 1.926002  | 0.749594  |
| H  | 3.968589  | 0.934952  | 1.632468  |
| H  | 2.463755  | -1.742588 | 1.613535  |
| H  | 4.176151  | -1.483914 | 1.267606  |
| H  | 3.173371  | -2.363530 | 0.112510  |
| H  | 4.947935  | 0.037110  | -0.513746 |
| H  | 3.830284  | 0.992352  | -1.484543 |
| H  | 3.920926  | -0.759221 | -1.716736 |

Energy + ZPE = -1374.605972 au.  
Free Energy = -1374.653890 au.



## References

1. R. F. W. Bader, *Atoms in Molecules. A Quantum Theory*, Oxford Science Publications, Clarendon Press, London 1990.
2. C. F. Matta and R. J. Boyd, *The Quantum Theory of Atoms in Molecules: from solid state to DNA and drug design*, Wiley-VCH, Weinheim, 2007.
3. C. S. López, O. N. Faza, F. P. Cossío, D. M. York and A. R. de Lera, *Chem. Eur. J.*, 2005, **11**, 1734-1738.
4. D. Cremer and E. Kraka, *Angew. Chem. Int. Ed. Eng.*, 1984, **23**, 627-628.
5. G. Merino, A. Vela and T. Heine, *Chem. Rev.*, 2005, **105**, 3812-3841.
6. P. L. A. Popelier, *Coor. Chem. Rev.*, 2000, **197**, 169-189.
7. R. F. W. Bader, T. T. Nguyen-Dang and Y. Tal, *Rep. Prog. Phys.*, 1981, **44**, 893-948.
8. M. M. Vallejos, N. M. Peruchena and S. C. Pellegrinet, *Org. Biomol. Chem.*, 2013, **11**, 7953-7965.
